# Supplementary material
Source: PubMed Central journal article supplement (PMC60865)
Supplement: pnas_98_23_13300__1.pdf [file pnas_98_23_13300__1.pdf]

**Table 2. Fraction of chromosomes with DMC hybridizing to chromosome specific paints.**

| <b>Cell Line</b> | <b>Cytogenetic abnormalities</b>                                                                          | <b>Chromosome paints with DMC</b> |          |           |           |
|------------------|-----------------------------------------------------------------------------------------------------------|-----------------------------------|----------|-----------|-----------|
|                  |                                                                                                           | <b>1</b>                          | <b>3</b> | <b>12</b> | <b>17</b> |
| <b>RH30</b>      | i(1p), i(1q), 1q-, 1p-, i(3q), 3p-, i(5q), i(9q), 11p-, i(17q), 22p+, 12p-, 20q+                          | n.d.                              | 10/15    | n.d.      | n.d.      |
| <b>CRL-5845</b>  | t(1p;5q), dup1q, der1(1p;inv1q), 1p-, t(3q;9q), t(3p;?),<br>5q-,9q-, t(10q;12q), 11p-, 12p-, 15q-, i(17q) | 7/33                              | 3/33     | 6/33      | 0/25      |
| <b>HELA</b>      | t(1q;3q), der3q, 3p-, 5q-, t(8p;11q), 12q-, i(15q), 19p+, 20p+                                            | 1/9                               | n.d.     | 3/9       | 0/15      |

Metaphase spreads prepared in the absence of colcemid were hybridized to chromosome-specific painting probes for human chromosomes 1, 3, 12 and 17. The values represent the number of chromosomes with DMC hybridizing to the probe over the total number of chromosomes with DMC scored. The cytogenetic abnormalities present in each cell line are also given. n.d. (not determined).
